# Supplementary material for: Guiding Field Surveys of Brazilian Vulnerable Baetidae (Ephemeroptera) through Species Distribution Modeling
Source: Research Square preprint supplement (doi:10.21203/rs.3.rs-8673498/v1), 2026-02-23
Supplement: Supplementary file 1 [file e59504169cc9f34b9e856149.docx]

**Supplementary material**

Table 1 - List of occurrence records containing coordinates by species.

| **Species** | **Longitude** | **Latitude** |
| --- | --- | --- |
| *Adebrotus lugoi* | -35,4794 | -8,36340 |
| *Adebrotus lugoi* | -40,0834 | -19,0038 |
| *Adebrotus lugoi* | -40,1082 | -18,9868 |
| *Adebrotus lugoi* | -40,2275 | -19,0268 |
| *Adebrotus lugoi* | -40,5131 | -18,6651 |
| *Camelobaetidius juparana* | -41,2681 | -20.4012 |
| *Camelobaetidius juparana* | -41,6860 | -20.4011 |
| *Camelobaetidius juparana* | -41,2688 | -20.4013 |
| *Camelobaetidius juparana* | -41,2692 | -20.4024 |
| *Camelobaetidius juparana* | -41,2685 | -20.4029 |
| *Camelobaetidius juparana* | -41,2691 | -20.4028 |
| *Camelobaetidius juparana* | -40,2405 | -19,1258 |
| *Camelobaetidius juparana* | -42,3000 | -19,8166 |
| *Camelobaetidius spinosus* | -42,3000 | -19,8166 |
| *Camelobaetidius spinosus* | -42,4672 | -19,7185 |

*Adebrotus lugoi*

Table 2 - Model metrics and standard deviation. AUC = Area under the curve; FPB = False positive rate; BIO = Bioclimate; DOM = Domain; MEA = Mean; RDF = Random Forest

| **Algorithm** | **AUC (SD)** | **Jaccard (SD)** | **Sorensen (SD)** | **Fpb (SD)** |
| --- | --- | --- | --- | --- |
| BIO | 0.6 (0.21) | 0.6 (0.21) | 0.7 (0.14) | 1.2 (0.42) |
| DOM | 0.7 (0.25) | 0.7 (0.25) | 0.8 (0.17) | 1.4 (0.51) |
| MEA | 1 (0) | 1 (0) | 1 (0) | 2 (0) |
| RDF | 1 (0) | 1 (0) | 1 (0) | 2 (0) |

Table 3 - Average contribution of variables

| **variables** | **mean** |
| --- | --- |
| bio7 | 0,051 |
| bio8 | 0,247 |
| bio9 | 0,207 |
| bio16 | 0,011 |
| bio17 | 0,057 |
| bio18 | 0,045 |
| bio19 | 0,108 |
| bio21 | 0,140 |
| bio24 | 0,134 |

*Camelobaetidius juparana*

Table 4 - Model metrics and standard deviation. AUC = Area under the curve; FPB = False positive rate; BIO = Bioclimate; MEA = Mean; RDF = Random Forest

| **Algoritmo** | **AUC (SD)** | **Jaccard (SD)** | **Sorensen (SD)** | **Fpb (SD)** |
| --- | --- | --- | --- | --- |
| BIO | 0,5 (0) | 0,5 (0) | 0,6 (0) | 1(0) |
| MEA | 0,1 (0,3) | 0,55 (0,15) | 0,7 (0,1) | 1,1(0,3) |
| RDF | 0,1 (0,3) | 0,55 (0,15) | 0,7 (0,1) | 1,1(0,3) |

Table 5 - Average contribution of variables

| **variables** | **mean** |
| --- | --- |
| bio7 | 0,051 |
| bio8 | 0,072 |
| bio9 | 0,068 |
| bio16 | 0,128 |
| bio17 | 0,050 |
| bio18 | 0,051 |
| bio19 | 0,075 |
| bio21 | 0,504 |
| bio24 | 0,002 |

*Camelobaetidius spinosus*

Table 6 - Model metrics and standard deviation. AUC = Area under the curve; FPB = False positive rate; BIO = Bioclimate; DOM = Domain; MEA = Mean; RDF=Random Forest

| **Algorithm** | **AUC (SD)** | **Jaccard (SD)** | **Sorensen (SD)** | **Fpb (SD)** |
| --- | --- | --- | --- | --- |
| BIO | 1(0) | 1(0) | 1(0) | 2(0) |
| DOM | 1(0) | 1(0) | 1(0) | 2(0) |
| MEA | 1(0) | 1(0) | 1(0) | 2(0) |
| RDF | 1(0) | 1(0) | 1(0) | 2(0) |

Table 7 - Average contribution of variables

| **variables** | **mean** |
| --- | --- |
| bio7 | 0,207 |
| bio8 | 0,225 |
| bio9 | 0,030 |
| bio16 | 0,064 |
| bio17 | 0,183 |
| bio18 | 0,041 |
| bio19 | 0,183 |
| bio21 | 0,062 |
| bio24 | 0,004 |
